# Supplementary material
Source: publisher figshare collection journal article supplement (https://diabetesjournals.figshare.com/articles/dataset/_/18018407)
Supplement: Supplementary file 1 [file 4]

## Supplemental Materials

| Supplemental Table: Selected completed birth cohorts – relatives and general population now completed or in follow up* |                                                                     |                                                             |                                       |                                                                                                |                                                                                                |                                                                                                                                                                                                                    |                                                                                                                                                                                                                                                                                                                    |
|------------------------------------------------------------------------------------------------------------------------|---------------------------------------------------------------------|-------------------------------------------------------------|---------------------------------------|------------------------------------------------------------------------------------------------|------------------------------------------------------------------------------------------------|--------------------------------------------------------------------------------------------------------------------------------------------------------------------------------------------------------------------|--------------------------------------------------------------------------------------------------------------------------------------------------------------------------------------------------------------------------------------------------------------------------------------------------------------------|
| Program:<br>Location                                                                                                   | Population<br>screened                                              | Location                                                    | Number<br>screened                    | Screening<br>material                                                                          | Screening<br>assays                                                                            | Rates of positive<br>screens                                                                                                                                                                                       | Comments                                                                                                                                                                                                                                                                                                           |
| BABYDIAB<br>1989-2000<br>(1)                                                                                           | Newborn<br>children of<br>those with<br>T1D                         | Germany                                                     | 2364                                  | Cord blood<br>then venous<br>blood                                                             | ICA and RBA:<br>IAA, GADA,<br>IA-2A, ZnT8A<br>and TTG AA                                       | <ul style="list-style-type: none"> <li>• AA+: 220(9%)</li> <li>• <math>\geq 2</math> AA+: 123(5%)</li> </ul>                                                                                                       | <ul style="list-style-type: none"> <li>• AA screening in cord blood, at 9 months and 2, 5, and 8 years</li> <li>• From 3 yrs, yearly oral glucose tolerance test monitoring if AA+</li> </ul>                                                                                                                      |
| DAISY<br>1993-2004                                                                                                     | Newborn<br>general<br>population<br>(GP) and<br>relatives <4<br>yrs | Colorado,<br>US                                             | Newborns<br>: 32,114                  | Cord blood<br>for HLA and<br>serum for<br>AA                                                   | <ul style="list-style-type: none"> <li>• RBA and ECL: IAA, GADA, IA-2A, ZnT8A, tTGA</li> </ul> | <ul style="list-style-type: none"> <li>• 1,424 GP newborns and 1,123 relatives identified and followed</li> <li>• AA+: 8%</li> <li>• <math>\geq 2</math> AA+: 5%</li> </ul>                                        | <ul style="list-style-type: none"> <li>• Genetically at-risk newborns based on HLA genotyping and relatives followed at 9, 15, 24 months and annually thereafter until age 20 y</li> <li>• AA+ followed q3-6 mo until 30 y</li> </ul>                                                                              |
| DEW-IT (2)<br>1995-2001<br>2010-2012                                                                                   | GP newborn<br>blood spots                                           | Washington,<br>US                                           | 42000<br>blood<br>spots<br>tested (3) | Dried new<br>born<br>screening<br>blood spots,<br>then serum<br>for AA                         | HLA<br>genotyping;<br>RBA: IAA,<br>GADA, IA-2A,<br>and later,<br>ZnT8A                         | <ul style="list-style-type: none"> <li>• 14.2% of children eligible for AA surveillance(3)</li> <li>• 3748 followed over time (3)</li> <li>• AA+: 173 (5%)</li> <li>• <math>\geq 2</math> AA+: 170 (5%)</li> </ul> | Cover letter and consent form mailed to Washington families. Consenting families received HLA genotyping of dried newborn blood spots followed by AA monitoring of at-risk individuals.                                                                                                                            |
| DiPiS (4)<br>2000-2004                                                                                                 | GP<br>newborns                                                      | Sweden                                                      | 35688                                 | Cord blood<br>for HLA,<br>blood spots<br>for GADA<br>and IA2A,<br>serum for<br>IAA and<br>ZnT8 | HLA<br>genotyping;<br>RBA: IAA,<br>GADA, IA-2A,<br>ZnT8A                                       | <ul style="list-style-type: none"> <li>• 7826 positive screens(3)</li> <li>• 4359 followed over time</li> <li>• AA+: 184 (4%)</li> <li>• <math>\geq 2</math> AA +: 100 (2%)</li> </ul>                             | <ul style="list-style-type: none"> <li>• Children identified for surveillance based on risk score that include HLA genotype and environmental, demographic, and historical risk factors.</li> <li>• Positive screens with yearly follow up. Those with <math>\geq 2</math> AA+ followed every 3 months.</li> </ul> |
| TEDDY (5)<br>2004-2010                                                                                                 | Newborns in<br>both<br>relatives<br>and GP                          | Clinical<br>centers in<br>US Finland,<br>Germany,<br>Sweden | 424,788                               | Capillary<br>blood spots                                                                       | HLA<br>genotyping;<br>RBA: IAA,<br>GADA, IA-2A,<br>tTGA                                        | 21589 (0.05%) of screens with high-risk HLA; 8676 parents consented to follow up.                                                                                                                                  | <ul style="list-style-type: none"> <li>• High-risk newborns followed every 3-6 months for 15 yrs for AAs and T1D, with documentation of potential environmental contributors.</li> <li>• 90% without a known relative with T1D</li> </ul>                                                                          |

Recent follow up data obtained from recent published references (3; 5) and personal communications (M Rewers)

GP=general population; AA- autoantibody; Study Acronyms: DAISY: Diabetes Autoimmunity Study in the Young; DEWIT: Diabetes Evaluation in Washington Study; DiPiS: Diabetes Prediction in Skane; TEDDY: The Environmental Determinants of Diabetes in Youth

### References

1. Ziegler AG, Hummel M, Schenker M, Bonifacio E: Autoantibody appearance and risk for development of childhood diabetes in offspring of parents with type 1 diabetes: the 2-year analysis of the German BABYDIAB Study. *Diabetes* 1999;48:460-468
2. Wion E, Brantley M, Stevens J, Gallinger S, Peng H, Glass M, Hagopian W: Population-wide infant screening for HLA-based type 1 diabetes risk via dried blood spots from the public health infrastructure. *Ann N Y Acad Sci* 2003;1005:400-403
3. Anand V, Li Y, Liu B, Ghalwash M, Koski E, Ng K, Dunne JL, Jonsson J, Winkler C, Knip M, Toppari J, Ilonen J, Killian MB, Frohnert BI, Lundgren M, Ziegler AG, Hagopian W, Veijola R, Rewers M, Group TDS: Islet Autoimmunity and HLA Markers of Presymptomatic and Clinical Type 1 Diabetes: Joint Analyses of Prospective Cohort Studies in Finland, Germany, Sweden, and the U.S. *Diabetes Care* 2021;
4. Elding Larsson H: A Swedish approach to the prevention of type 1 diabetes. *Pediatric diabetes* 2016;17 Suppl 22:73-77
5. Bonifacio E, Weiss A, Winkler C, Hippich M, Rewers MJ, Toppari J, Lernmark A, She JX, Hagopian WA, Krischer JP, Vehik K, Schatz DA, Akolkar B, Ziegler AG, Group TS: An Age-Related Exponential Decline in the Risk of Multiple Islet Autoantibody Seroconversion During Childhood. *Diabetes Care* 2021;
